## Effects of Acute Normovolemic Hemodilution on Splanchnic Oxygenation and on Hepatic Histology and Metabolism in Anesthetized Pigs

Gabriele F. E. Nöldge, M.D.,\* Hans-Joachim Priebe, M.D.,† Wolfram Bohle, M.D.,‡  
Klaus Jürgen Buttler,§ Klaus Geiger, M.D.¶

Perioperative hemodilution (HD) has become an accepted means of reducing transfusion requirements. Therefore, the effects of limited (decrease in hematocrit [Hct] from 30 to 20%, "HD1") and severe (decrease in Hct from 20 to 14%, "HD2") acute normovolemic HD with 6% hydroxyethyl starch on splanchnic blood flows (electromagnetic flow probes), O<sub>2</sub> uptakes and deliveries, surface O<sub>2</sub> tensions (P<sub>O<sub>2</sub></sub>) (Clark-type electrode), hepatic metabolism (organic acids), and hepatic histology (liver biopsies) were studied in nine pigs anesthetized and paralyzed with ketamine/flunitrazepam and pancuronium. HD1 caused significant ( $P < 0.05$ ) increases in cardiac output and all splanchnic flows. Only hepatic arterial blood flow increased twice as much as did cardiac output. Except for hepatic arterial O<sub>2</sub> delivery, all splanchnic O<sub>2</sub> deliveries decreased. Splanchnic O<sub>2</sub> extractions increased, and O<sub>2</sub> uptakes remained unchanged. There were no changes in mean surface P<sub>O<sub>2</sub></sub> values or in surface P<sub>O<sub>2</sub></sub> histograms of liver and small intestine; in portal or hepatic venous pH; and in hepatic uptake of pyruvate and lactate. In contrast, during HD2 (despite further increases in flows and O<sub>2</sub> extractions) portal and hepatic venous pH decreased; mean surface P<sub>O<sub>2</sub></sub> of liver and small intestine decreased; and the liver surface P<sub>O<sub>2</sub></sub> histogram showed broadening and a shift to the left. However, hepatic uptake of lactate and pyruvate, and splanchnic O<sub>2</sub> uptake remained unchanged, and histologic examination did not reveal significant cell injury. These data indicate that in this experimental model limited acute normovolemic HD was well tolerated by the splanchnic organs. After severe HD, gross liver function remained intact, but there was evidence that compensatory mechanisms (increases in flows and O<sub>2</sub> extractions) were no longer fully able to counteract the decrease in splanchnic O<sub>2</sub> delivery. (Key words: Hemodilution: acute normovolemic. Liver: blood flow; histology; metabolism; oxygen supply; oxygen uptake; surface P<sub>O<sub>2</sub></sub>. Small intestine: blood flow; oxygen uptake; surface P<sub>O<sub>2</sub></sub>.)

TRANSFUSION carries a multitude of risks, including transfusion reactions, transmission of infection or other diseases, and possible immune suppression.<sup>1</sup> Consequently,

alternatives to the use of homologous blood products are increasingly being sought.<sup>2,3</sup> One such alternative is perioperative normovolemic hemodilution (HD).<sup>4</sup>

Numerous studies have investigated the effects of acute HD on individual organs and overall circulation both in humans<sup>5</sup> and in experimental animals.<sup>6</sup> However, there are few data on the effects of HD on splanchnic perfusion and oxygenation.<sup>7-9</sup> Furthermore, neither of the latter studies considered the metabolic or morphologic consequences of an acute decrease in splanchnic arterial O<sub>2</sub> content. Such information may be particularly important because intraoperative liver hypoxia is likely to contribute to postoperative hepatic dysfunction.<sup>10</sup> Since mechanical ventilation and laparotomy by themselves contribute to impaired hepatic circulation,<sup>10,11</sup> avoidance of interventions that significantly interfere with hepatic O<sub>2</sub> supply is particularly important during abdominal surgery. The safety of various degrees of acute HD with regard to liver function therefore needs to be established.

The current study evaluates and compares the effects of limited and severe HD on small intestinal and hepatic perfusion and oxygenation. Since changes in calculated O<sub>2</sub> delivery, O<sub>2</sub> extraction, and surface O<sub>2</sub> tension (P<sub>O<sub>2</sub></sub>) may not necessarily reflect respective changes in whole organ oxygenation,<sup>12</sup> function, and morphology, the metabolic and histologic parameters indicative of global hepatic function and morphology were determined simultaneously. To our knowledge no such information has yet been available. Although certain strains of pigs have baseline hematocrit (Hct) values less than those of humans, the pig was chosen because of its anatomic and physiologic similarity to humans with respect to the cardiovascular and digestive systems.<sup>13</sup>

### Materials and Methods

#### INSTRUMENTATION

The experimental protocol was approved by the local Committee on Animal Research. The study was performed in 14 4-5-month-old domestic pigs of either sex, weighing 30-38 kg. After overnight fasting and intramuscular azoperon (5 mg/kg), anesthesia was induced with intravenous (iv) methomidate (6 mg/kg) administered *via* ear vein and was maintained by continuous iv

\* Staff Anesthesiologist.

† Professor of Anesthesia.

‡ Resident in Pathology.

§ Medical Student.

¶ Professor and Chairman of Anesthesia.

Received from the Departments of Anesthesia and Pathology, University Hospital, Freiburg, Federal Republic of Germany. Accepted for publication January 24, 1991. Supported in part by Fresenius Company, Homburg, Federal Republic of Germany. Presented in part at the Annual Meeting of the American Society of Anesthesiologists, Las Vegas, October 1990.

Address reprint requests to Dr. Nöldge: Anaesthesiologische Universitätsklinik, Hugstetter Str. 55, 7800 Freiburg im Breisgau, Federal Republic of Germany.

infusions of ketamine ( $4 \text{ mg} \cdot \text{kg}^{-1} \cdot \text{h}^{-1}$ ) and flunitrazepam ( $0.0125 \text{ mg} \cdot \text{kg}^{-1} \cdot \text{h}^{-1}$ ). After tracheotomy, mechanical ventilation was provided by a constant-volume ventilator (Siemens, SV 900 B, Stockholm, Sweden) and facilitated by a continuous iv infusion of pancuronium ( $0.12 \text{ mg} \cdot \text{kg}^{-1} \cdot \text{h}^{-1}$ ). Respiratory rates and inspired  $\text{O}_2$  concentration were adjusted to maintain arterial  $\text{CO}_2$  tension between 38 and 42 mmHg, and the arterial  $\text{O}_2$  tension between 95 and 115 mmHg. All animals were in the supine horizontal position. Body temperature was continuously monitored by a thermistor of a flow-directed thermodilution catheter (model 93A-131-7F, Edwards Laboratory) and was kept constant by placing the animals on a heating pad and by warming the inspired gases. Catheters were inserted into the abdominal aorta *via* the left and the right femoral artery (16-G Cavafix®-Certo, Braun, Melsungen, FRG), into the pulmonary artery (model 93A-131-7F, Edwards Laboratory), and the superior vena cava *via* right (16-G Cavafix®-Certo, Braun) and left (7 Fr  $\times$  8-inch radiopaque polyurethane two-lumen indwelling catheter, Arrow, Reading, PA) internal jugular veins. All animals received  $10\text{--}15 \text{ ml} \cdot \text{kg}^{-1} \cdot \text{h}^{-1}$  Ringer's solution to maintain central venous pressure constant.

After median laparotomy, the left hepatic vein was cannulated (18-G Vasofix Braunüle, Braun) *via* transhepatic puncture as previously described.<sup>14</sup> Correct position of the cannula tip in the main stem of the two hepatic veins was verified at autopsy. The portal vein was cannulated (20-G Leader Cath 115, Vygon, Ecouen, France) as previously described.<sup>14</sup>

Precalibrated electromagnetic flow probes (Stölzer Messtechnik, Waldkirch, FRG) of appropriate sizes to ensure a snug fit were placed around the hepatic artery, the portal vein, and the superior mesenteric artery. Care was taken to preserve the periarterial nerve plexus. The flow probes were connected to flow meters with incorporated nonocclusive zero (Hellige, Freiburg, FRG), which was checked repeatedly during the experiment. The superior gastroduodenal artery was ligated to ensure that true hepatic blood flow was measured.

#### HEMODYNAMIC MEASUREMENTS

Intravascular catheters (left femoral arterial, portal venous, hepatic venous, and right jugular venous) were connected to pressure transducers (type 840, Senso Nor, Horten, Norway). A multichannel recorder (Hellige, Freiburg, FRG) was used for the recording of signals. Cardiac output was determined by thermodilution technique (cardiac output computer model 404-1, Siemens, Erlangen, FRG). The mean value of triplicate injections of 5 ml ice-cold, temperature-monitored saline was considered to reflect actual cardiac output if the measurements were within a range of  $\pm 5\%$  from the calculated mean.

Total hepatic blood flow was calculated as the sum of hepatic arterial and portal venous blood flows. Vascular resistances (systemic, hepatic arterial, portal venous, and superior mesenteric arterial) were calculated using the formulas provided in the appendix. Heart rate was derived from the R-R intervals of an extremity ECG.

#### DETERMINATION OF OXYGEN SUPPLY/UPTAKE

Blood gas tensions and pH values were determined using an ABL 3 autoanalyzer (Radiometer, Copenhagen, Denmark). Hemoglobin  $\text{O}_2$  saturations were measured by an OSM 3 hemoximeter (Radiometer, Copenhagen, Denmark). Hct was measured from centrifuged (Bayer AG, Compur Microspin, Leverkusen, FRG) arterial blood sampled in capillary tubes. Hemoglobin concentration was determined by the cyan methemoglobin method.  $\text{O}_2$  contents,  $\text{O}_2$  deliveries,  $\text{O}_2$  uptakes, and  $\text{O}_2$  extraction ratios were derived using formulas provided in the appendix.

Preliminary studies showed that there were no differences between portal and mesenteric venous  $\text{O}_2$  content. Thus, portal venous  $\text{O}_2$  content was used for the calculation of small intestinal  $\text{O}_2$  uptake (see appendix).

#### DETERMINATION OF SURFACE $\text{PO}_2$ OF LIVER AND SMALL INTESTINE

Surface  $\text{PO}_2$  of liver and small intestine were measured simultaneously using a multiwire platinum electrode, as described previously.<sup>15,16</sup> Preliminary studies showed that placement of the electrodes at different areas of liver and small intestine surfaces produced comparable results. At each stage a total of about 100 individual  $\text{PO}_2$  measurements were obtained at 10–15 different electrode locations. The distribution of these values, presented as summary surface  $\text{PO}_2$  histograms, reflects tissue oxygenation, which is the net result of (*i.e.*, the difference between) nutritive blood flow and tissue  $\text{O}_2$  consumption.<sup>17</sup>

#### DETERMINATION OF HEPATIC METABOLIC FUNCTION

Arterial, portal venous, and hepatic venous blood samples were collected for enzymatic determination<sup>18</sup> of lactate and pyruvate concentrations. Hepatic uptake of lactate and pyruvate were calculated using the formulas provided in the appendix.

Arterial glutamic pyruvic transaminase (GPT) and glutamic oxaloacetic transaminase (GOT) were measured using optimized standard methods as recommended by the German Society of Clinical Chemistry.<sup>19</sup>

#### HISTOLOGIC EXAMINATIONS OF THE LIVER

In 12 animals liver tissue samples were obtained by standard needle biopsy (cutting biopsy needle 1.8 mm

× 10 cm, Angiomed, Karlsruhe, FRG). Sections for light microscopy were fixed in a solution containing 1% formaldehyde, 0.5% glutaraldehyde, and 0.1 M calcium acetate were stained with hematoxylin-eosin and van Gieson's stain. Cell damage was estimated semiquantitatively, as to the presence of no necrosis (−), single cell necroses (+), and larger centrilobular necroses (++).

In order to reduce bias, slides were assessed by two independent observers unaware of the experimental procedure during which the biopsies had been obtained. In addition, part of the slides were evaluated twice by both observers with the results of the first assessment unknown to both.

For electron microscopy the specimens were fixed in 3.5% buffered glutaraldehyde (pH 7.4), postfixed in 1% osmium tetroxide for 3 h, and embedded in Araldit. Ultrathin sections were contrasted with 2% uranyl acetate

and 0.02% lead citrate and examined using a Philipps CM 10 electron microscope.

### EXPERIMENTAL PROTOCOL

At the end of the surgical preparation, at least 30 min was allowed before baseline readings during ketamine/funitrazepam anesthesia were obtained.

Subsequently, two degrees of normovolemic HD were induced: these were limited HD (mean Hct 20%, "HD1") and severe HD (mean Hct 14%, "HD2"). This was achieved by simultaneously replacing blood (withdrawn *via* the right femoral artery) by roughly equal amounts of 6% hydroxyethyl starch (molecular weight 450,000 D, Plasmasteril®, Fresenius, Homburg, FRG) administered at body temperature *via* the left jugular vein. As indices of normovolemia, central venous and pulmonary capillary

TABLE 1. Baseline Values and Values during Limited (HD1) and Severe (HD2) Hemodilution

| Variables                                 | Baseline     | HD1           | HD2            |
|-------------------------------------------|--------------|---------------|----------------|
| Hematocrit (%)                            | 30 ± 1       | 20 ± 1*       | 14 ± 1*†       |
| Hemoglobin (g%)                           | 9.1 ± 0.4    | 6.0 ± 0.3*    | 4.1 ± 0.2*†    |
| Intravascular pressure                    |              |               |                |
| Central venous (mmHg)                     | 2.5 ± 0.4    | 2.5 ± 0.4     | 2.6 ± 0.4      |
| Pulmonary capillary wedge (mmHg)          | 6.7 ± 0.4    | 6.6 ± 0.5     | 6.7 ± 0.5      |
| Portal venous (mmHg)                      | 7.4 ± 0.6    | 7.1 ± 0.8     | 7.5 ± 0.9      |
| Hepatic venous (mmHg)                     | 2.7 ± 0.4    | 2.6 ± 0.4     | 2.8 ± 0.4      |
| Blood flows                               |              |               |                |
| Cardiac output (l/min)                    | 3.6 ± 0.2    | 4.1 ± 0.2*    | 4.5 ± 0.2*†    |
| Total hepatic (ml/min)                    | 652.7 ± 20.4 | 793.6 ± 28.6* | 895.4 ± 32.9*† |
| Hepatic arterial (ml/min)                 | 87.2 ± 7.6   | 136.0 ± 8.9*  | 165.7 ± 13.4*† |
| Hepatic arterial (% of total hepatic)     | 13 ± 1       | 17 ± 2*       | 19 ± 2*†       |
| Portal venous (ml/min)                    | 576.4 ± 27.5 | 674.8 ± 29.8* | 750.4 ± 43.8*† |
| Superior mesenteric arterial (ml/min)     | 392.9 ± 33.6 | 447.4 ± 51.8* | 498.3 ± 51.9*† |
| Vascular resistances                      |              |               |                |
| Hepatic arterial (U)                      | 1041 ± 148   | 705 ± 47*     | 503 ± 37*†     |
| Portal venous (U)                         | 9 ± 1        | 7 ± 1*        | 7 ± 1*         |
| Superior mesenteric arterial (U)          | 224 ± 25     | 201 ± 29*     | 173 ± 35*†     |
| Hemoglobin oxygen saturation              |              |               |                |
| Mixed venous (%)                          | 80.2 ± 2.1   | 75.5 ± 1.7*   | 67.0 ± 4.5*†   |
| Oxygen content                            |              |               |                |
| Mixed venous (ml/100 ml)                  | 10.1 ± 0.7   | 6.2 ± 0.4*    | 3.9 ± 0.4*†    |
| Oxygen extractions                        |              |               |                |
| Liver                                     | 0.30 ± 0.03  | 0.38 ± 0.04*  | 0.49 ± 0.04*†  |
| Small intestine                           | 0.21 ± 0.02  | 0.28 ± 0.04*  | 0.33 ± 0.03*†  |
| Total body                                | 0.19 ± 0.02  | 0.24 ± 0.02*  | 0.32 ± 0.05*†  |
| Tissue surface P <sub>O<sub>2</sub></sub> |              |               |                |
| Liver (mmHg)                              | 55.3 ± 2.9   | 54.0 ± 1.4    | 40.9 ± 5.4*†   |
| Small intestine (mmHg)                    | 55.7 ± 2.4   | 53.9 ± 1.1    | 45.4 ± 2.7*†   |
| Hepatic uptakes                           |              |               |                |
| Pyruvate (μmol/min)                       | 10 ± 5       | 23 ± 16       | 14 ± 8         |
| Lactate (μmol/min)                        | 672 ± 162    | 483 ± 102     | 558 ± 165      |
| pH values                                 |              |               |                |
| Arterial                                  | 7.35 ± 0.01  | 7.34 ± 0.02   | 7.32 ± 0.02    |
| Portal venous                             | 7.30 ± 0.01  | 7.29 ± 0.02   | 7.25 ± 0.02*†  |
| Hepatic venous                            | 7.33 ± 0.02  | 7.33 ± 0.02   | 7.30 ± 0.02*†  |
| Liver enzyme concentrations               |              |               |                |
| GOT (U/l)                                 | 33 ± 4       | 26 ± 2*       | 20 ± 2*†       |
| GPT (U/l)                                 | 24 ± 3       | 15 ± 2*       | 9 ± 2*†        |

Values are means ± SEM.

\*  $P < 0.05$  compared to baseline.

†  $P < 0.05$  compared to HD1.

‡ GOT = glutamic oxaloacetic transaminase; GPT = glutamic pyruvic transaminase.

wedge pressures were kept constant during the HD procedure.

After the Hct had been decreased to the required levels of 20% (HD1) and 14% (HD2), the respective measurements at HD1 and HD2 were made after at least 15 min of stable hemodynamics.

In five additional animals, the effects of time on the stability of the surgical preparation were evaluated during baseline conditions (laparotomy and ketamine/flunitrazepam anesthesia). The surgical preparation was performed as described above. No intervention was undertaken after baseline readings had been obtained, and repeat measurements were made 3 h later.

In seven animals biopsies were obtained approximately 30 min after the end of the surgical preparation (baseline) and after severe HD (HD2). In three animals biopsies were taken at baseline and 3 h later (time controls). In order to evaluate the effects of the surgical preparation itself, in five animals liver biopsies were obtained immediately after laparotomy, and also after the entire instrumentation had been finished.

#### STATISTICAL ANALYSIS

The data were statistically analyzed by Friedman's statistic followed by Wilcoxon signed-rank test (for comparison between experimental periods) and by Kruskal-Wallis one-way analysis of variance followed by Mann-Whitney test (for comparisons within experimental periods). A *P*

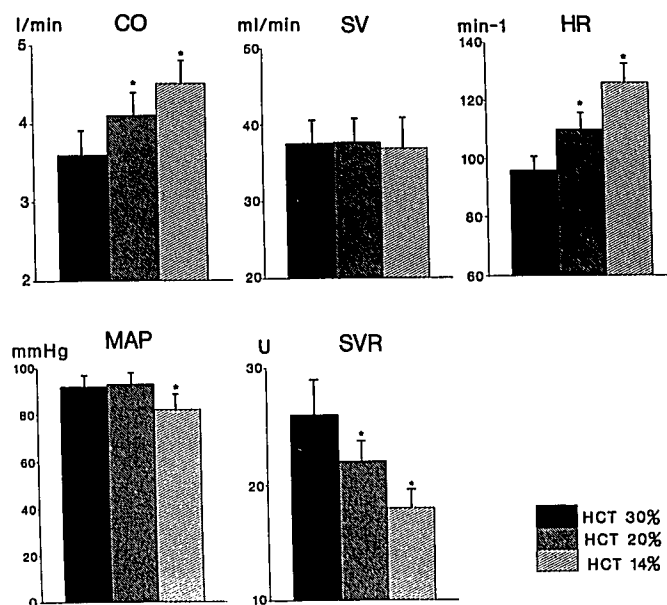

FIG. 1. Systemic hemodynamics during baseline (Hct 30%) and during limited (Hct 20%) and severe (Hct 14%) acute normovolemic hemodilution. \**P* < 0.05 compared to preceding value. CO = cardiac output; SV = stroke volume; HR = heart rate; MAP = mean arterial pressure; SVR = systemic vascular resistances; HCT = hematocrit.

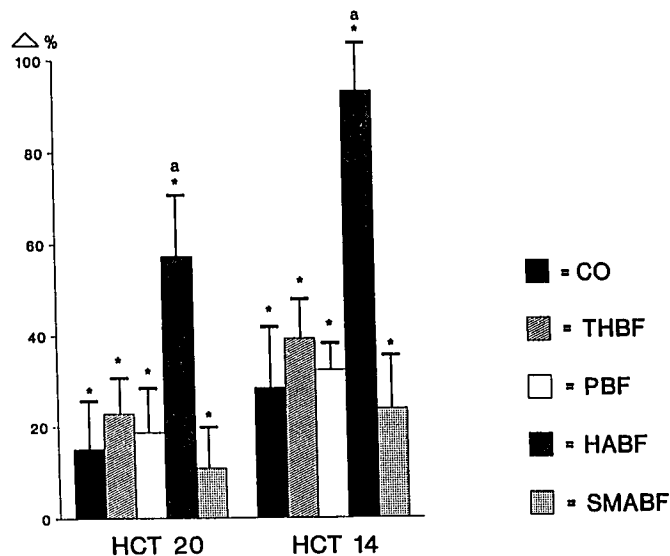

FIG. 2. Percent changes from baseline values (see table 1 and fig. 1) in cardiac output (CO) and splanchnic blood flows. \**P* < 0.05 compared to no (zero) change. a = *P* < 0.05 compared to all other blood flows; THBF, HABF, PBF, and SMABF = total hepatic, hepatic arterial, portal, and superior mesenteric arterial blood flows, respectively.

value of <0.05 was considered statistically significant. Values are presented as means  $\pm$  standard errors of the means (SEM).

#### Results

In order to reduce the Hct from an initial value of 30%  $\pm$  1 to 20  $\pm$  1 (HD1) and 14%  $\pm$  1 (HD2), 17  $\pm$  2 (HD1) and 35  $\pm$  2 ml/kg (HD2) of blood were withdrawn and replaced by 18  $\pm$  1 (HD1) and 38  $\pm$  2 ml/kg (HD2) of 6% hydroxyethyl starch. At this exchange ratio central venous and capillary wedge pressures remained unchanged (table 1).

#### SYSTEMIC AND SPLANCHNIC HEMODYNAMICS

Stepwise normovolemic HD resulted in approximately 15% (HD1) and 30% (HD2) increases in cardiac output and heart rate (table 1, fig. 1). Stroke volume remained unchanged, and mean arterial pressure decreased slightly (11%) during HD2 only (fig. 1). Portal venous and hepatic venous pressures remained unchanged during both HD steps (table 1).

Increasing HD induced progressive increases in total hepatic, hepatic arterial, portal venous, and superior mesenteric arterial blood flows (table 1). When expressed as percent changes from baseline values, hepatic arterial blood flow increased more than twice as much as did cardiac output and all other blood flows during each HD step (fig. 2). As a consequence, hepatic arterial blood flow expressed as fraction of total hepatic blood flow increased significantly (table 1). Similarly, whereas total hepatic

(19%  $\pm$  1) and superior mesenteric arterial blood (12%  $\pm$  1) flows expressed as fractions of cardiac output did not change, hepatic arterial blood flow expressed as a fraction of cardiac output increased from the initial 2.2%  $\pm$  0.3 to 3.5%  $\pm$  0.2 during HD2.

There also were quantitative differences in the effects of HD on regional vascular resistances. Portal venous vascular resistance decreased initially but was not decreased further by HD2. In contrast, all other calculated vascular resistances (systemic, hepatic arterial, and superior mesenteric arterial) decreased progressively (fig. 1, table 1). Again, the greatest decrease in vascular resistance was observed in the hepatic arterial bed (approximately 30 and 50% during HD1 and HD2, respectively) (table 1).

There were no correlations between increases in hepatic arterial blood flow or decreases in hepatic arterial vascular resistances and changes in hepatic venous or portal venous  $P_{O_2}$  and  $O_2$  saturation.

#### SYSTEMIC AND SPLANCHNIC $O_2$ SUPPLY/ UPTAKE RELATIONSHIPS

Increasing normovolemic HD resulted in progressive decreases in arterial, portal venous, hepatic venous, and mixed venous  $O_2$  contents. This was due both to progressive reduction in Hct and (except for arterial hemoglobin  $O_2$  saturation, which remained unchanged) decreases in  $O_2$  saturations (portal, hepatic, and mixed venous) (fig. 3, table 1).

Consequently, except for hepatic arterial  $O_2$  delivery, which was preserved during both HD stages, all  $O_2$  de-

liveries (total hepatic, portal venous, and superior mesenteric arterial) decreased progressively (fig. 3).

$O_2$  delivery/uptake relationships associated with limited and severe normovolemic HD are shown in figure 4. Whole body, liver, and small intestine  $O_2$  uptakes remained unchanged and were independent of  $O_2$  deliveries during both HD stages. All  $O_2$  extraction ratios increased continuously (table 1).

#### TISSUE OXYGENATION OF LIVER AND SMALL INTESTINE

There were no differences in mean liver and small intestine surface  $P_{O_2}$  between baseline values and those obtained during limited (HD1) normovolemic HD (figs. 5, 6, table 1). However, severe HD (HD2) resulted in decreases in mean liver and small intestine surface  $P_{O_2}$  values of approximately 30 and 20%, respectively. Summary surface  $P_{O_2}$  histograms of liver and small intestine did not change their original bell shape during HD1. However, during HD2 the liver surface  $P_{O_2}$  histogram was broadened at the base and shifted to the left, with  $P_{O_2}$  values below 20 mmHg, in approximately 20% of all  $P_{O_2}$  measurements. In contrast, the small intestine surface  $P_{O_2}$  histogram retained its bell-shaped form even during HD2, with no  $P_{O_2}$  values in the hypoxic ranges.

#### HEPATIC METABOLIC FUNCTION

Hepatic lactate and pyruvate uptake remained unchanged during both HD1 and HD2 (table 1). Whereas

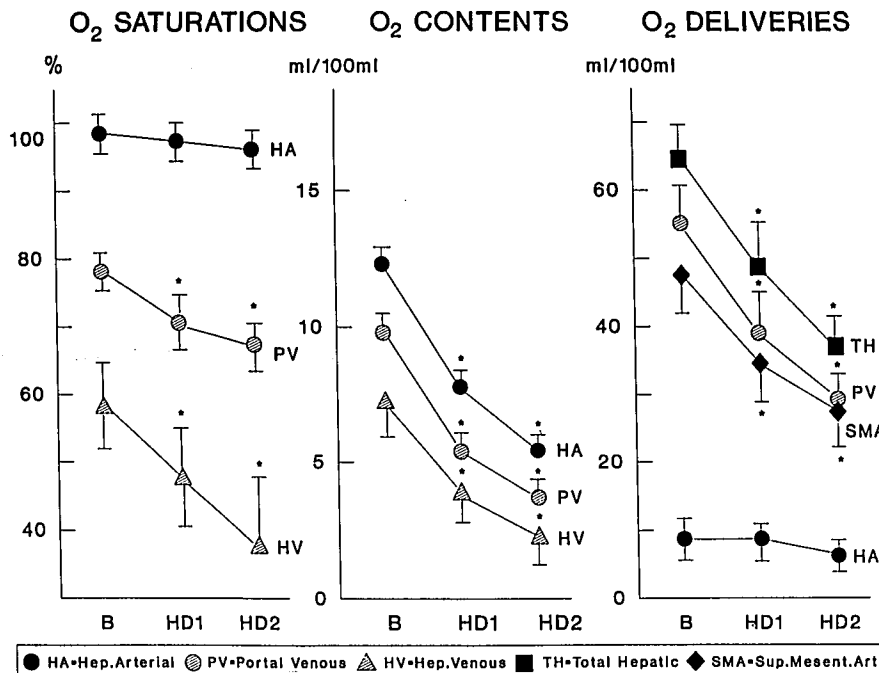

FIG. 3. Hemoglobin  $O_2$  saturations, contents, and deliveries during baseline (B) and during limited (HD1) and severe (HD2) normovolemic hemodilution. \* $P$  < 0.05 compared to preceding value.

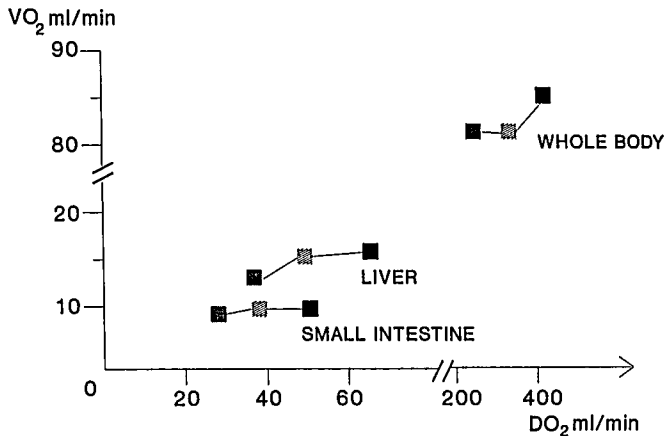

FIG. 4. Relationship between  $\dot{V}_{O_2}$  and  $\dot{D}_{O_2}$  of whole body, liver, and small intestine during baseline (hematocrit [HCT] 30%, solid squares) and during limited (HCT 20%, dark hatched squares) and severe (HCT 14%, light hatched squares) normovolemic hemodilution.

arterial pH remained unchanged during both HD1 and HD2, portal venous and hepatic venous pH values remained unchanged during HD1 only, but they decreased during HD2. There were continuous decreases in serum concentrations of GOT and GPT (table 1).

#### HISTOPATHOLOGY OF THE LIVER

At baseline, in three of seven animals studied there was no evidence of cell injury. Four animals demonstrated single-cell necroses. After severe HD, all animals showed

single-cell necroses. Differences between baseline and HD2 were not statistically significant. Histology was not affected by either time or the surgical preparation.

After severe HD, four of seven animals showed vacuolization of hepatocytes predominantly localized in the midlobular area. On osmication these vacuoles were found to be osmiophobic (and so were confirmed as not containing fat). Ultrastructural investigation revealed large vacuoles occupying large parts of the cytoplasm. The vacuoles were lined by a single-unit membrane and contained a delicate flocculent substance. Sometimes short linear or spiral membrane fragments could be observed. These large vacuoles resulted from fusion of smaller endocytotic vesicles. Other cell organelles, in particular mitochondria and the endoplasmic reticulum appeared normal. Kupffer cells, Ito cells, and sinusoidal endothelial cells remained unchanged (fig. 7).

#### EFFECT OF TIME ON THE STABILITY OF THE SURGICAL PREPARATION DURING BASELINE ANESTHESIA

In the five animals studied, changes in parameters of hemodynamics, oxygenation, and metabolism over a 3-h period were not statistically significant. Except for total systemic (22% increase) and total hepatic  $\dot{V}_{O_2}$  (20% decrease) and hepatic lactate uptake (35% decrease), changes in mean values of 45 parameters measured or calculated did not exceed 13%.

In three animals studied there were only insignificant changes in liver biopsies over the 3-h period.

FIG. 5. Summary histograms of liver surface  $P_{O_2}$  from nine pigs during baseline and during limited (HD1) and severe (HD2) normovolemic hemodilution (HD). n = total number of measurements;  $P_{sO_2}$  = mean surface tissue  $P_{O_2}$ ; and  $P_{aO_2}$  = mean arterial  $P_{O_2}$  during recording of the histograms.

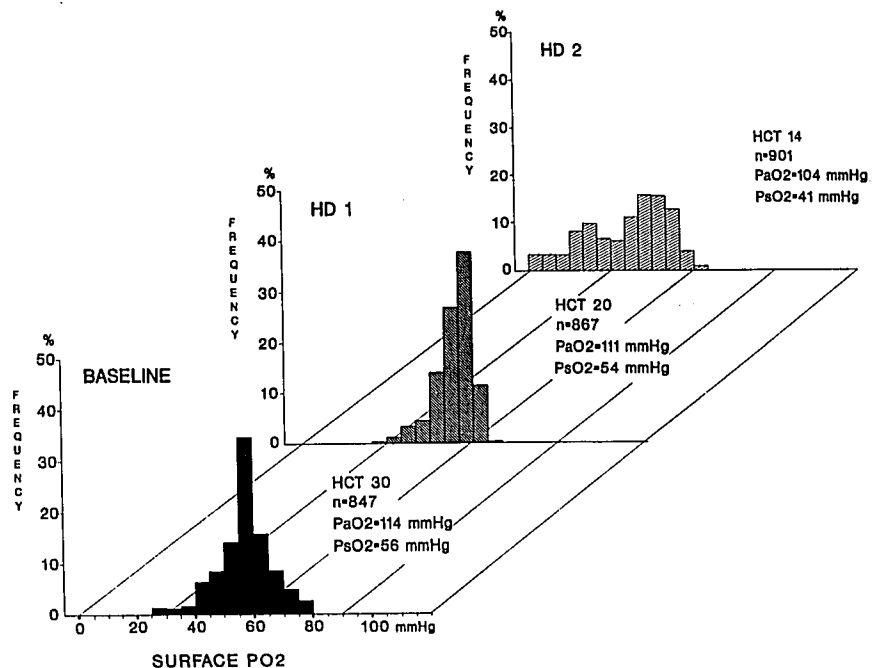

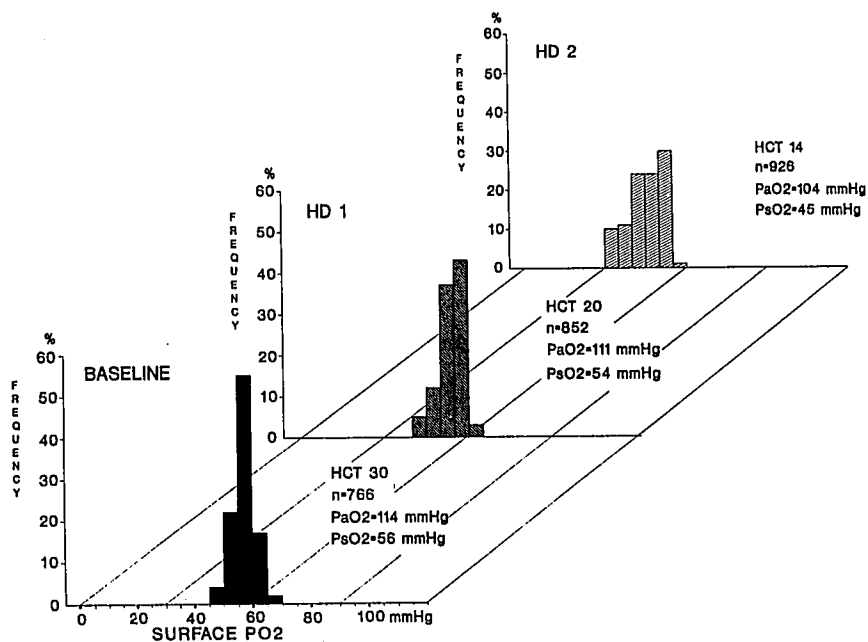

FIG. 6. Summary histograms of small intestine surface  $PO_2$  ( $n = 9$ ). (See legend to fig. 5 for abbreviations.)

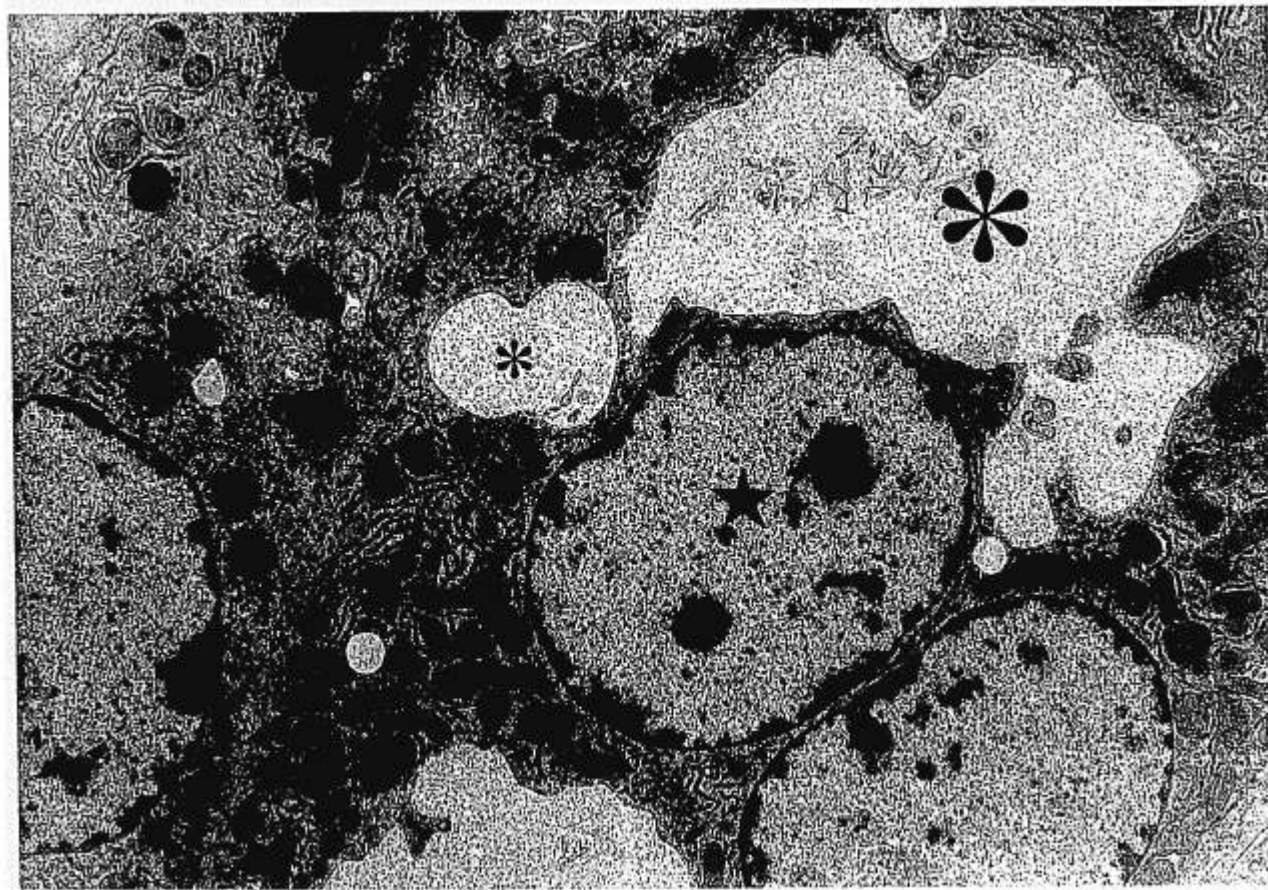

FIG. 7. Midzonal hepatocyte after severe hemodilution with hydroxyethyl starch. Hydroxyethyl starch-containing, irregular-shaped giant endosome (large asterisk), lined by a single unit membrane and containing delicate flocculent substance. The giant endosome occupies large parts of the cytoplasm. Small endosome before fusion (small asterisk). Mitochondria (arrowhead) revealed no swelling. Endoplasmic reticulum (double arrowhead) showed no dilatation. Nucleolus (star). Original magnification  $\times 4,900$ .

### EFFECT OF SURGICAL PROCEDURE ON LIVER MORPHOLOGY

In the five animals studied liver biopsies obtained immediately after laparotomy and after the entire instrumentation did not differ significantly from each other.

#### Discussion

The principal findings of this study can be summarized as follows. 1) Progressive HD resulted in progressive increases in all splanchnic flows. 2) Hepatic arterial blood flow increased out of proportion to all other splanchnic flows and cardiac output. 3) No hepatic arterial buffer response was noted during acute HD. 4) During limited HD (decrease in Hct from 30 to 20%) mean surface  $P_{O_2}$  of liver and small intestine, and portal and hepatic venous pH were maintained. 5) During severe HD (decrease in Hct to 14%), the surface  $P_{O_2}$  of liver and small intestine declined; the surface  $P_{O_2}$  histograms shifted to the left; and portal and hepatic venous pH values decreased. 6) Even during severe HD, splanchnic  $O_2$  uptake had not yet become dependent on  $O_2$  delivery.

#### CRITIQUE OF METHODS

These studies were conducted in anesthetized pigs whose lungs were ventilated during laparotomy. The pig was chosen because of its anatomic and physiologic similarities to humans with respect to the cardiovascular and digestive systems,<sup>13</sup> and particularly with respect to liver enzyme systems.<sup>20</sup> Both laparotomy and mechanical ventilation are known to interfere with splanchnic perfusion.<sup>10,11</sup> Both ketamine<sup>21</sup> and pancuronium<sup>22</sup> have little or no effect on liver and preportal circulation. The effects of flunitrazepam on the splanchnic circulation are unknown. It therefore is emphasized that the effects associated with acute HD occurred during a baseline anesthesia with ketamine/flunitrazepam and during laparotomy. In addition, it should be emphasized that animals with a presumably normal circulation were studied. Translation of this data to patients with diseased circulation (*e.g.*, longstanding hypertension or atherosclerosis) is therefore unwarranted.

The protocol required extensive surgical preparation. Both baseline anesthesia and surgery may have resulted in spontaneous deterioration of the preparation over time and thus may have influenced the results. However, findings of insignificant changes in parameters of hemodynamics, oxygenation, and metabolism as well as in liver morphology over time obtained in numerous control animals rule out significant spontaneous deterioration in this experimental model.

Six percent hydroxyethyl starch was chosen as replacement fluid. It is a macromolecular polymer consisting of hydroxyethylated glucose molecules linked by  $\alpha$ -1.4

bonds. The intravascular half-life is about 12 h. Due to its physicochemical characteristics and minimal adverse effects, it is as suitable as 6% Dextran 70 to induce HD.<sup>23</sup>

If potentially adverse effects of acute HD are to be kept at a minimum, maintenance of normovolemia becomes essential. Although we did not determine actual blood volume, circumstantial evidence suggested that normovolemia was maintained. First, the amount of hydroxyethyl starch administered was slightly in excess of the amount of blood withdrawn. Second, right and left cardiac filling pressures remained unchanged throughout. Third, cardiac output was able to increase by 15 (HD1) and 25% (HD2). Fourth, stroke volume remained unchanged despite increases in heart rate by 15 (HD1) and 30% (HD2).

The technique of measuring surface  $P_{O_2}$  using  $O_2$ -sensitive multiwire electrodes has been well established.<sup>15,16</sup> Although surface  $P_{O_2}$  may not necessarily reflect whole organ  $P_{O_2}$ , this technique allows determination of tissue  $P_{O_2}$  without causing tissue trauma or interference with the microcirculation.<sup>16</sup>

#### HEMODILUTION AND SYSTEMIC CIRCULATION

In agreement with previous work,<sup>9,24,25</sup> cardiac output increased in response to HD. However, in contrast to previous findings, this increase was due to an increase in heart rate rather than in stroke volume. Differences in heart rate response may be related to differences in species, baseline anesthesia, cardiac filling pressures, and baseline heart rates. It is not at all surprising that heart rates are less likely to increase in response to HD if they are already elevated during baseline conditions.<sup>26</sup> It is unlikely that the increase in heart rate reflected hypovolemia. If hypovolemia had been present, stroke volume would have decreased in response to the increase in heart rate; cardiac output would not have increased by 15 (HD1) and 25% (HD2); and right and left cardiac filling pressures probably would not have remained unchanged throughout.

#### HEMODILUTION AND SPLANCHNIC CIRCULATION

Progressive HD resulted in progressive increases in all flows. Whereas most flows (*i.e.*, superior mesenteric arterial, portal venous, and total hepatic) increased proportionally to cardiac output (fig. 2), hepatic arterial blood flow increased twice as much. Thus, the increase in hepatic arterial blood flow cannot be explained solely by the increase in cardiac output or the decrease in blood viscosity caused by HD. These findings imply that the hepatic artery (more than other vascular beds and apparently unrelated to or in addition to the changes in cardiac output and viscosity) actively dilated.

If active hepatic arterial vasodilation was to compensate for the decrease in  $O_2$  delivery, what might have been



the stimulus? Hepatic venous  $P_{O_2}$  and  $O_2$  saturations declined progressively during HD1 and HD2, and hepatic venous  $pH$  decreased during HD2. However, there were no statistically significant correlations between changes in hepatic arterial blood flow or hepatic vascular resistance and changes in hepatic venous  $P_{O_2}$ ,  $O_2$  saturation, or  $pH$ .

The pronounced increases in hepatic arterial blood flow observed in this study could not necessarily have been expected. The hepatic arterial buffer response<sup>27</sup> predicts that changes in portal blood flow lead to opposite changes in hepatic arterial blood flow. Accordingly, as portal blood flow increases, hepatic arterial blood flow decreases. Numerous investigations have documented the hepatic arterial buffer response,<sup>28,29</sup> suggesting that total hepatic perfusion is flow-regulated rather than being demand-dependent. It is postulated that the rate of intrahepatic adenosine washout forms the basis for the hepatic arterial buffer response.<sup>30</sup>

The current findings must be interpreted in this context. Either they provide evidence against the adenosine-washout hypothesis (*i.e.*, total hepatic perfusion is not just flow-regulated), or they indicate that factors related to HD overcome or at least modulate the hepatic arterial buffer response. Two such factors may be the associated changes in cardiac output and blood viscosity. However, this does not explain why hepatic arterial vascular resistance declined almost twice as much as did the resistances of other vascular beds. At least after HD1, there was no evidence that hepatic oxygenation was endangered. We are unable to provide a plausible explanation for why hepatic arterial blood flow increased out of proportion to other flows. It is conceivable that the hepatic arterial buffer response is not as effective in pigs as it is in cats<sup>30</sup> or dogs.<sup>29</sup> It also is possible that the degree of the response varies with the baseline anesthesia and with the initial value for the relative contribution of hepatic arterial blood flow to total hepatic blood flow.

#### HEMODILUTION AND SPLANCHNIC OXYGENATION, HEPATIC METABOLISM, AND MORPHOLOGY

As a result of the progressive decrease in Hct and due to decreases in  $O_2$  saturations (portal and hepatic venous), there were progressive decreases in  $O_2$  contents of all vascular beds (fig. 3). Consequently,  $O_2$  deliveries to most vascular beds (total hepatic, portal venous, superior mesenteric arterial, and systemic) decreased (fig. 3) despite concomitant increases in respective flows. The hepatic artery was the only vascular bed that maintained  $O_2$  delivery because of its unchanged  $O_2$  saturation (fig. 3) and the out-of-proportional increase in flow. Since in this model hepatic arterial blood flow contributes between just 13 (baseline) and 19% (HD2) to total hepatic blood flow, unchanged hepatic arterial  $O_2$  delivery could not com-

pensate for the marked decrease in portal venous  $O_2$  delivery (as reflected by the decrease in total hepatic  $O_2$  delivery). The pig compensated for reduced  $O_2$  contents and  $O_2$  deliveries by progressively increasing flows (by lowering vascular resistances) and  $O_2$  extraction ratios.

After the first HD step, there was no evidence of organ dysfunction. Portal as well as hepatic venous  $pH$  values remained unchanged, as did the distribution and the mean values of surface  $P_{O_2}$  values of liver and small intestine. Similarly, hepatic uptakes of lactate and pyruvate did not change significantly.

In contrast, after the second HD step there were significant decreases in both portal (from 7.29 to 7.25) and hepatic venous  $pH$  values (from 7.33 to 7.30), and the summary  $P_{O_2}$  histogram of the liver showed a broadening at the base and a leftward shift, with more than 25% of  $P_{O_2}$  values below 25 mmHg. This is clear evidence of impaired microcirculation. Although a tendency for a leftward shift also was observed in the surface  $P_{O_2}$  histogram of the small intestine, these changes were less pronounced: no  $P_{O_2}$  values were below 30 mmHg. On the other hand, the decreases in mean surface  $P_{O_2}$  values were similar for liver (from 54 to 41 mmHg) and small intestine (from 54 to 41 mmHg). Combined evidence thus suggests that during severe HD (mean Hct 14%), compensatory mechanisms (*i.e.*, increases in flows and  $O_2$  extraction ratios) were no longer able fully to compensate for the decreases in  $O_2$  deliveries and to maintain tissue oxygenation at baseline values.

Despite decreases in  $O_2$  delivery by approximately 40% and evidence of just marginally compensated organ function,  $O_2$  uptake of liver and small intestine did not decrease significantly. This implies that the point at which tissue  $O_2$  uptake becomes limited by delivery in a supply-dependent manner (*i.e.*, critical  $O_2$  delivery) had not yet been reached. However, plots of  $O_2$  uptake *versus* delivery of both liver and small intestine (fig. 4) suggest that between data points HD1 and HD2,  $O_2$  uptake may be about to decline; *i.e.*, the point of critical  $O_2$  delivery may almost have been reached.

After severe HD large vacuoles were observed in the midzonal hepatocytes in four of seven animals. Ultrastructural investigation revealed giant endosomes containing a delicate flocculent substance. Clearly, these were caused by an endocytotic process leading to a fusion of small endosomes. In accordance with previous reports,<sup>31</sup> we assume that these vacuoles reflect an early hepatocytic storage of hydroxyethyl starch. Interestingly, these phenomena were not observed in all animals, indicating differences between individuals in the ability of hepatocytes to uptake hydroxyethyl starch. It is important that even in these midzonal hydroxyethyl starch-storing hepatocytes, no signs of hypoxic damage, *i.e.*, swelling of mitochondria, dilation of the endoplasmic reticulum, or fatty

degeneration were observed. So, it seems unlikely that the observed storage of hydroxyethyl starch impaired hepatocellular function.

#### COMPARISON WITH PREVIOUS WORK

Most previous studies have found insignificant changes in hepatic arterial blood flow in response to HD.<sup>8,9,25,32</sup> Only one study<sup>7</sup> in addition to ours has shown a significant increase in hepatic arterial blood flow. Total hepatic blood flow was found to be unchanged<sup>8</sup> or to increase<sup>7</sup> and portal blood flow also to increase.<sup>8</sup>

Direct comparison of these results with ours is difficult because of differences in species (pigs *vs.* cats<sup>8</sup> *vs.* dogs<sup>7,9,25</sup> *vs.* rats<sup>32</sup>), in baseline anesthesia (ketamine/flunitrazepam *vs.* pentobarbital<sup>8,9,25</sup> *vs.* neuroleptic<sup>32</sup> *vs.* conscious<sup>7</sup>), in degree of HD, in means of achieving HD, and in methods of determining hepatic blood flow (electromagnetic flow probes *vs.* microspheres<sup>9,25,32</sup> *vs.* bromsulphalein<sup>7</sup> *vs.* reservoir<sup>8</sup>). Furthermore, in most of these studies portal blood flow was not determined.<sup>7,9,25,32</sup> Such lack of flow measurement will render determination of total hepatic blood flow and consequently any evaluation of a potential hepatic arterial buffer response impossible.

#### CONCLUSIONS

In conclusion, we have shown that in anesthetized and laparotomized pigs, acute moderate HD (from an initial Hct of 30 down to 20%) with 6% hydroxyethyl starch is well tolerated by liver and small intestine. Compensatory mechanisms (increases in splanchnic flows and O<sub>2</sub> extractions) effectively counteracted the decreases in splanchnic O<sub>2</sub> deliveries. It is interesting to note that hepatic arterial blood flow increased twice as much as cardiac output, superior mesenteric arterial flow, and portal blood flow.

During further HD (to a final mean Hct of 14%), lack of statistically significant changes in splanchnic O<sub>2</sub> uptake, in hepatic metabolism (lactate and pyruvate uptake), and in hepatic histology indicate that even severe HD did not have grossly adverse effects. However, significant decreases in mean surface P<sub>O<sub>2</sub></sub> of liver and small intestine; a broadening and a leftward shift of the liver surface P<sub>O<sub>2</sub></sub> histogram; decreases in portal and hepatic venous pH and O<sub>2</sub> content values; and tendency for hepatic cellular injury, all provide evidence that compensatory mechanisms were becoming exhausted. However, lack of swelling of mitochondria, lack of dilation of the endoplasmic reticulum, and lack of fatty degeneration exclude injury at the ultrastructural level.

It remains to be determined whether the human splanchnic circulation and organs respond to acute HD in a manner similar to those of the pig. Normal Hct values in humans are approximately 45% (rather than 30% as in the pig). We are therefore unable to define the human

correlate to a Hct of 20 (after HD1) and 14% (after HD2) in the pig. In the human, comparably low Hct values may reflect a much greater degree of HD. If only the percent changes in Hct after HD1 (33%) and HD2 (50%) were applied, this would correspond to absolute Hct values of approximately 30 (HD1) and 20% (HD2) in humans.

We thank Dr. W. Müller for technical support; Dr. J. Schulte-Mönting for the statistical analysis; Prof. Dr. U. v. Specht for providing research facilities; and R. Mavinga, G. Steinert, and B. Kristinus for secretarial support.

#### References

1. Schriemer PA, Longnecker DE, Mintz PD: The possible immunosuppressive effects of perioperative blood transfusion in cancer patients. *ANESTHESIOLOGY* 68:422-428, 1988
2. Toy PTCY, Strauss RG, Stehling LC, Sears R, Pride TH, Rossi EC, Collins ML, Crowley JP, Eisenstaedt RS, Goodnough LT, Greenwalt TJ, Johnston MFM, Kennedy MS, Lenes BA, Lusher JM, Mintz PD, Patten ED, Simon TL, Westphal RG: Predeposited autologous blood for elective surgery: A national multicenter study. *N Engl J Med* 316:517-520, 1987
3. Breyer RH, Engelman RM, Rousou JA, Lemeshow S: Blood conservation for myocardial revascularization: Is it cost-effective? *J Thorac Cardiovasc Surg* 93:512-522, 1987
4. Messmer K, Kreimeier U, Intaglietta M: Present state of intentional hemodilution. *Eur Surg Res* 18:254-263, 1986
5. Laks H, Pilon RN, Klövekorn WP, Anderson W, MacCallum JR, O'Connor NE: Acute hemodilution. *Ann Surg* 180:103-109, 1974
6. Jan K-M, Chien S: Effect of hematocrit variations on coronary hemodynamics and oxygen utilization. *Am J Physiol* 233:H106-H113, 1977
7. Chamorro G, Rodriguez JA, Dzindzio B, Rapaport E: Effect of acute isovolemic anemia on cardiac output and estimated hepatic blood flow in the conscious dog. *Circ Res* 32:530-535, 1973
8. Lautt WW: Control of hepatic and intestinal blood flow: effect of isovolemic haemodilution on blood flow and oxygen uptake in the intact liver and intestines. *J Physiol (Lond)* 265:313-326, 1977
9. Fan F-C, Chen RYZ, Schuessler GB, Chien S: Effects of hematocrit variations on regional hemodynamics and oxygen transport in the dog. *Am J Physiol* 238:H545-H552, 1980
10. Gelman S: General anesthesia and hepatic circulation. *Can J Physiol Pharmacol* 65:1762-1779, 1987
11. Bohrer SL, Rogers EL, Koehler RC, Traystman RJ: Effect of hypovolemic hypotension and laparotomy on splanchnic and hepatic arterial blood flow in dogs. *Curr Surg* 38:325-328, 1981
12. Gelman S, Longnecker DE: Isoflurane and hepatic oxygenation. *ANESTHESIOLOGY* 69:639-640, 1988
13. Dadds WJ: The pig model for biomedical research. *Fed Proc* 41:247-256, 1982
14. Nöldge GFE, Priebe H-J, Kopp K-H, Pelchen T, Riegel W, Geiger K: Differences in effects of isoflurane and enflurane on splanchnic oxygenation and hepatic metabolism in the pig. *Anesth Analg* 71:258-267, 1990
15. Kessler M, Hoepfer J, Krumme BA: Monitoring of tissue perfusion and cellular function. *ANESTHESIOLOGY* 45:184-197, 1976
16. Conzen PF, Hobbhahn J, Goetz AE, Habazettl H, Granetzny T, Peter K, Brendel W: Splanchnic oxygen consumption and hepatic surface oxygen tensions during isoflurane anesthesia. *ANESTHESIOLOGY* 69:643-651, 1988

17. Nylander E, Lund N, Wranne B: Effect of increased blood oxygen affinity on skeletal muscle surface oxygen pressure fields. *J Appl Physiol* 54:99-104, 1983
18. Hörl WH, Echsel E, Hohenegger M: The key role of sex dependency on kidney citrate metabolism in the rat. *Res Exp Med* 185:69-75, 1985
19. German Society of Clinical Chemistry: Standardization of methods for the estimation of enzyme activities in biological fluids. *Z Klin Chem Klin Biochem* 10:182-192, 1972
20. Short CR, Stith RD: Perinatal development of hepatic microsomal mixed function oxidase activity in swine. *Biochem Pharmacol* 22:1309-1319, 1973
21. Thomson IA, Fitch W, Campbell D, Watson R: Effects of ketamine on liver blood flow and hepatic oxygen consumption. Studies in the anaesthetized greyhound. *Acta Anaesthesiol Scand* 32: 10-14, 1988
22. Saxena PR, Dhasmana KM, Prakash O: A comparison of systemic and regional hemodynamic effects of *d*-tubocurarine, pancuronium, and vecuronium. *ANESTHESIOLOGY* 59:102-108, 1983
23. Messmer KFW: The use of plasma substitutes with special attention to their side effects. *World J Surg* 11:69-74, 1987
24. Messmer K: Compensatory mechanisms for acute dilutional anemia. *Biblthca Haemat* 47:31-42, 1981
25. Crystal GJ, Rooney MW, Salem MR: Regional hemodynamics and oxygen supply during isovolemic hemodilution alone and in combination with adenosine-induced controlled hypotension. *Anesth Analg* 67:211-218, 1988
26. Cox RB: Influence of pentobarbital anesthesia on cardiovascular function in trained dogs. *Am J Physiol* 223:651-659, 1972
27. Lauth WW: Mechanism and role of intrinsic regulation of hepatic arterial blood flow: Hepatic arterial buffer response (editorial review). *Am J Physiol* 249:G549-G556, 1985
28. Lauth WW: Control of hepatic arterial blood flow: Independence from liver metabolic activity. *Am J Physiol* 239:H559-H564, 1980
29. Mathie RT, Blumgart LH: The hepatic haemodynamic response to acute portal venous blood flow reductions in the dog. *Pflügers Arch* 399:223-227, 1983
30. Lauth WW, Legare DJ, D'Almeida MS: Adenosine as putative regulator of hepatic arterial flow (the buffer response). *Am J Physiol* 248:H331-H338, 1985
31. Pfeifer U, Kult J, Förster H: Hepatische Speicherung von Hydroxyäthylstärke (HES) bei Langzeithämodialyse. *Verh Dtsch Ges Pathol* 67:722, 1983
32. Woodson RD, Auerbach S: Effect of increased oxygen affinity and anemia on cardiac output and its distribution. *J Appl Physiol* 53:1299-1306, 1982

### Appendix: Formulas

#### VASCULAR RESISTANCES

$$SVR(U) = \frac{MAP \text{ (mmHg)} - CVP \text{ (mmHg)}}{CO \text{ (l/min)}}$$

$$HAVR(U) = \frac{MAP \text{ (mmHg)} - HVP \text{ (mmHg)}}{HABF \text{ (ml/min)}} \times 10^3$$

$$PVVR(U) = \frac{PVP \text{ (mmHg)} - HVP \text{ (mmHg)}}{PBF \text{ (ml/min)}} \times 10^3$$

$$SMAVR(U) = \frac{MAP \text{ (mmHg)} - PVP \text{ (mmHg)}}{SMABF \text{ (ml/min)}} \times 10^3$$

SVR, HAVR, PVVR, and SMAVR = systemic, hepatic arterial, portal venous, and superior mesenteric arterial vascular resistances, respectively; MAP, CVP, PVP, and HVP = mean arterial, central venous, portal venous, and hepatic venous pressures, respectively; CO = cardiac output; HABF, PBF, and SMABF = hepatic arterial, portal venous, and superior mesenteric arterial blood flows, respectively.

#### OXYGEN SUPPLY/UPTAKE

$$O_2 \text{ content } (C_{O_2}) = Hb \times O_2 \text{ saturation} \times 1.34 + P_{O_2} \times 0.0031$$

$$O_2 \text{ delivery } (\dot{V}_{O_2}) = O_2 \text{ content} \times \text{flow}$$

$$\dot{V}_{O_2}TH = \dot{V}_{O_2}HA + \dot{V}_{O_2}PV$$

$$\dot{V}_{O_2}HA = C_{O_2}A \times HABF \times 10^{-2}$$

$$\dot{V}_{O_2}PV = C_{O_2}PV \times PVF \times 10^{-2}$$

$$\dot{V}_{O_2}SMA = C_{O_2}A \times SMABF \times 10^{-2}$$

$$\dot{V}_{O_2}TH = (C_{O_2}PV - C_{O_2}HV) \times PBF \times 10^{-2} + (C_{O_2}A - C_{O_2}HV) \times HABF \times 10^{-2}$$

$$\dot{V}_{O_2}SI = (C_{O_2}A - C_{O_2}PV) \times SMABF \times 10^{-2}$$

$$E_{O_2}TH = \dot{V}_{O_2}TH / \dot{V}_{O_2}TH$$

$$E_{O_2}SI = \dot{V}_{O_2}SI / \dot{V}_{O_2}SMA$$

$\dot{V}_{O_2}TH$ ,  $\dot{V}_{O_2}HA$ ,  $\dot{V}_{O_2}PV$ , and  $\dot{V}_{O_2}SMA$  = total hepatic, hepatic arterial, portal venous, and superior mesenteric arterial  $O_2$  deliveries, respectively;  $C_{O_2}A$ ,  $C_{O_2}PV$ , and  $C_{O_2}HV$  = systemic arterial, portal venous, and hepatic venous  $O_2$  contents, respectively;  $\dot{V}_{O_2}TH$  and  $\dot{V}_{O_2}SI$  = total hepatic and small intestinal  $O_2$  uptake, respectively;  $E_{O_2}TH$  and  $E_{O_2}SI$  = total hepatic and small intestinal  $O_2$  extraction ratios, respectively.

#### HEPATIC METABOLISM

$$\text{Hepatic lactate uptake} = (C_{LAC}PV - C_{LAC}HV)$$

$$\times PBF + (C_{LAC}HA - C_{LAC}HV) \times HABF$$

$$\text{Hepatic pyruvate uptake} = (C_{PYR}PV - C_{PYR}HV)$$

$$\times PBF + (C_{PYR}HA - C_{PYR}HV) \times HABF$$

$C_{LAC}$  and  $C_{PYR}$  = lactate and pyruvate concentrations, respectively, in hepatic arterial (HA), portal venous (PV), and hepatic venous (HV) blood.
